# Supplementary material for: Impact of pH Modification on Protein Polymerization and Structure–Function Relationships in Potato Protein and Wheat Gluten Composites
Source: PubMed Central journal article supplement (PMC6337652; doi:10.3390/ijms20010058), 2018-12-24
Supplement: ijms-20-00058-s001.pdf [file ijms-20-00058-s001.pdf]

## Supplementary information

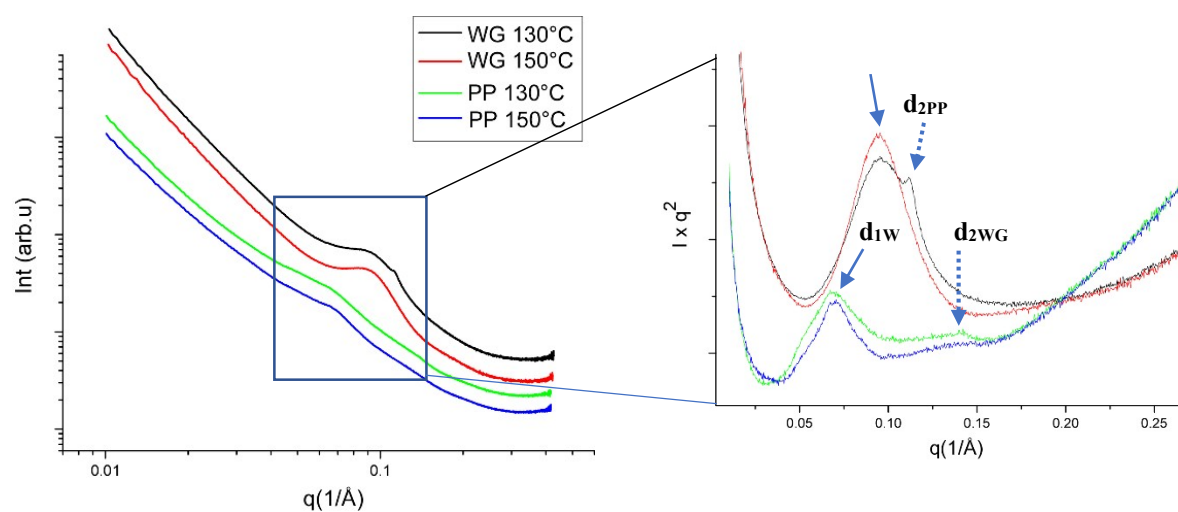

**Figure S1.** SAXS curves of WG and PP pressed one at 130 and another one at 150 °C. Curves are shifted vertically for clarity and  $I \times q^2$  plot is drawn to enhance the behavior of  $d_1$  and  $d_2$  peaks.

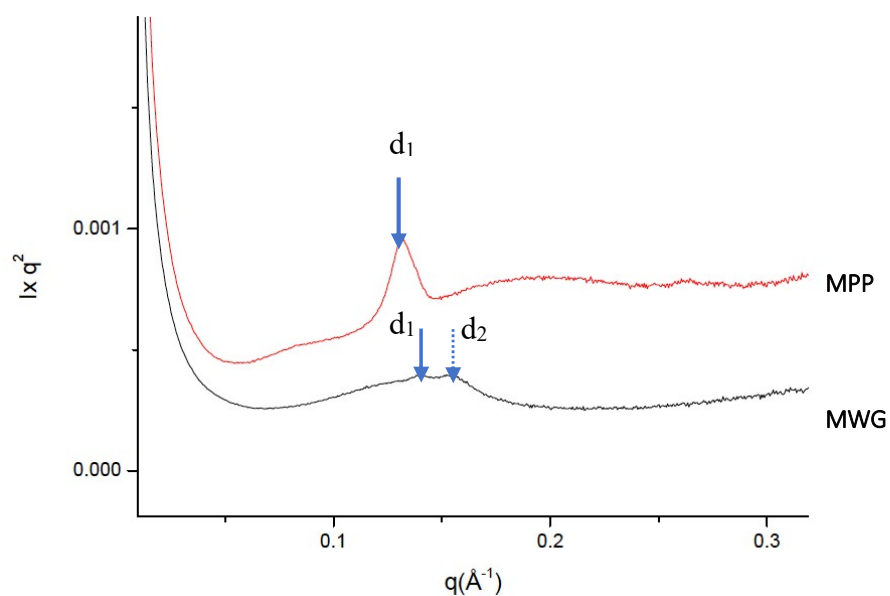

**Figure S2.** SAXS curves of MWG and MPP films pressed at 130°C.  $I \times q^2$  plot is drawn to enhance the behaviour of  $d_1$  (dotted and intense arrows) and  $d_2$  (intense arrow) peaks.

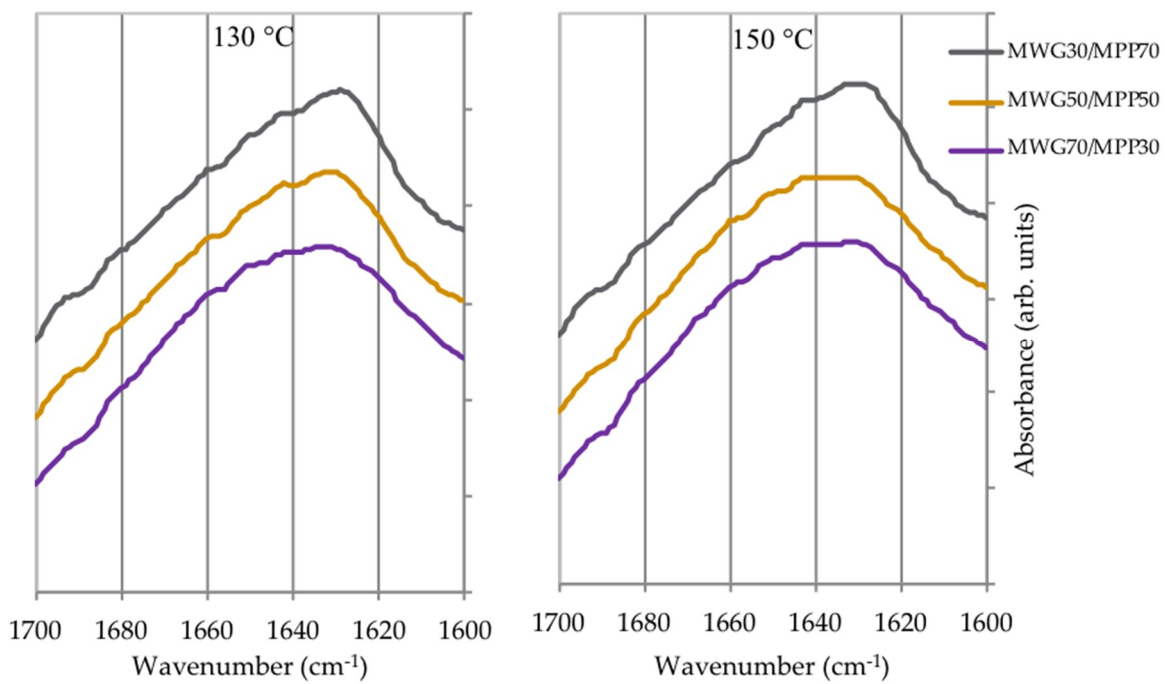

**Figure S3.** FT-IR spectra of MWG/MPP blends, one pressed at 130 and another one at 150 °C.
